# Supplementary material for: Evolving together: Cassandra retrotransposons gradually mirror promoter mutations of the 5S rRNA genes
Source: bioRxiv or medRxiv preprint supplement (doi:10.1101/2023.07.14.548913), 2023-07-15
Supplement: Supplementary file [file media-2.pdf]

**Suppl. table 1A: Data sources for published Cassandra sequences**

| plant order  | plant family      | species                          | accession number                     | reference              | DOI                       |
|--------------|-------------------|----------------------------------|--------------------------------------|------------------------|---------------------------|
| Polypodiales | Didymochlaenaceae | <i>Didymochlaena trunculata</i>  | AY860311.1                           | Kalendar et al., 2008, | 10.1073/pnas.0709698105   |
| Polypodiales | Nephrolepidaceae  | <i>Nephrolepis exaltata</i>      | AY860313.1                           | Kalendar et al., 2008  | 10.1073/pnas.0709698105   |
| Cyatheales   | Cyatheaceae       | <i>Sphaeropteris cooperi</i>     | AY860310.1                           | Kalendar et al., 2008  | 10.1073/pnas.0709698105   |
| Piperales    | Aristolochiaceae  | <i>Saruma henryi</i>             | EF125873.1                           | Kalendar et al., 2008  | 10.1073/pnas.0709698105   |
| Poales       | Poaceae           | <i>Amblyopyrum muticum</i>       | AY603371.1                           | Kalendar et al., 2008  | 10.1073/pnas.0709698105   |
|              | Poaceae           | <i>Avena sativa</i>              | AY271960.1                           | Kalendar et al., 2008  | 10.1073/pnas.0709698105   |
|              | Poaceae           | <i>Brachypodium distachyon</i>   | Supplemental material from reference | Gao et al., 2016       | 10.1186/s13059-015-0867-y |
|              | Poaceae           | <i>Bromus sterilis</i>           | AY271957                             | Kalendar et al., 2008  | 10.1073/pnas.0709698105   |
|              | Poaceae           | <i>Colpodium drakensbergense</i> | FJ975775.1                           | Kalendar et al., 2020  | 10.3390/ijms21082931      |
|              | Poaceae           | <i>Colpodium versicolor</i>      | FJ975776.1                           | Kalendar et al., 2020  | 10.3390/ijms21082931      |
|              | Poaceae           | <i>Deschampsia antarctica</i>    | EU867815                             | Kalendar et al., 2020  | 10.3390/ijms21082931      |
|              | Poaceae           | <i>Eremopyrum distans</i>        | AY603372.1                           | Kalendar et al., 2008  | 10.1073/pnas.0709698105   |
|              | Poaceae           | <i>Henrardia persica</i>         | AY603374.1                           | Kalendar et al., 2008  | 10.1073/pnas.0709698105   |
|              | Poaceae           | <i>Hordeum brachyantherum</i>    | AY603373.1                           | Kalendar et al., 2008  | 10.1073/pnas.0709698105   |
|              | Poaceae           | <i>Hordeum marinum</i>           | AY603375.1                           | Kalendar et al., 2008  | 10.1073/pnas.0709698105   |
|              | Poaceae           | <i>Hordeum vulgare</i>           | AY164585.1                           | Kalendar et al., 2008  | 10.1073/pnas.0709698105   |
|              | Poaceae           | <i>Oryza brachyantha</i>         | Supplemental material from reference | Gao et al., 2016       | 10.1186/s13059-015-0867-y |
|              | Poaceae           | <i>Oryza glaberrima</i>          | HM481419.1                           | Kalendar et al., 2020  | 10.3390/ijms21082931      |
|              | Poaceae           | <i>Oryza minuta</i>              | HM481420.1                           | Kalendar et al., 2020  | 10.3390/ijms21082931      |
|              | Poaceae           | <i>Oryza sativa indica</i>       | Supplemental material from reference | Gao et al., 2016       | 10.1186/s13059-015-0867-y |
|              | Poaceae           | <i>Oryza sativa japonica</i>     | Supplemental material from reference | Gao et al., 2016       | 10.1186/s13059-015-0867-y |
|              | Poaceae           | <i>Panicum virgatum</i>          | KM262797.1                           | Kalendar et al., 2020  | 10.3390/ijms21082931      |
|              | Poaceae           | <i>Peridictyon sanctum</i>       | AY603376.1                           | Kalendar et al., 2008  | 10.1073/pnas.0709698105   |
|              | Poaceae           | <i>Phleum pratense</i>           | AF538613.1                           | unpublished            |                           |
|              | Poaceae           | <i>Psathyrostachys fragilis</i>  | AY271962.2                           | Kalendar et al., 2008  | 10.1073/pnas.0709698105   |
|              | Poaceae           | <i>Saccharum hybrid</i>          | KC686839.1                           | Kalendar et al., 2020  | 10.3390/ijms21082931      |
|              | Poaceae           | <i>Secale cereale</i>            | AY359471.1                           | Kalendar et al., 2008  | 10.1073/pnas.0709698105   |
|              | Poaceae           | <i>Setaria italica</i>           | Supplemental material from reference | Gao et al., 2016       | 10.1186/s13059-015-0867-y |
|              | Poaceae           | <i>Spartina alterniflora</i>     | AY603377.1                           | Kalendar et al., 2008  | 10.1073/pnas.0709698105   |
|              | Poaceae           | <i>Sorghum bicolor</i>           | Supplemental material from reference | Gao et al., 2016       | 10.1186/s13059-015-0867-y |

|                |               |                                                        |                                      |                         |                              |
|----------------|---------------|--------------------------------------------------------|--------------------------------------|-------------------------|------------------------------|
|                | Poaceae       | <i>Triticum aestivum</i>                               | AY271963.1                           | Kalendar et al., 2008   | 10.1073/pnas.0709698105      |
|                | Poaceae       | <i>Zea mays</i>                                        | AY271958.1                           | Kalendar et al., 2008   | 10.1073/pnas.0709698105      |
|                | Poaceae       | <i>Zingeria biebersteiniana</i> ssp. <i>trichopoda</i> | FJ975780.1                           | Kalendar et al. 2020    | 10.3390/ijms21082931         |
|                | Poaceae       | <i>Zingeria biebersteiniana</i>                        | FJ975777.1                           | Kalendar et al. 2020    | 10.3390/ijms21082931         |
|                | Poaceae       | <i>Zingeria kochii</i>                                 | FJ975778.1                           | Kalendar et al. 2020    | 10.3390/ijms21082931         |
|                | Poaceae       | <i>Zingeria pisdica</i>                                | FJ975779.1                           | Kalendar et al. 2020    | 10.3390/ijms21082931         |
| Malpighiales   | Clusiaceae    | <i>Garcinia mangostana</i>                             | EU140956.1                           | Kalendar et al., 2020   | 10.3390/ijms21082931         |
|                | Linaceae      | <i>Linum usitatissimum</i>                             | DQ767972.1                           | Kalendar et al., 2008   | 10.1073/pnas.0709698105      |
|                | Euphorbiaceae | <i>Jatropha curcas</i>                                 | Supplemental material from reference | Gao et al., 2016        | 10.1186/s13059-015-0867-y    |
| Fabales        | Fabaceae      | <i>Cajanus cajan</i>                                   | Supplemental material from reference | Gao et al., 2016        | 10.1186/s13059-015-0867-y    |
|                | Fabaceae      | <i>Glycine max</i>                                     | Supplemental material from reference | Gao et al., 2016        | 10.1186/s13059-015-0867-y    |
|                | Fabaceae      | <i>Lens culinaris</i>                                  | KX889392                             | Rey-Banos et al., 2016, | 10.1371/journal.pone.0176728 |
|                | Fabaceae      | <i>Lotus japonicus</i>                                 | Supplemental material from reference | Gao et al., 2016        | 10.1186/s13059-015-0867-y    |
|                | Fabaceae      | <i>Medicago truncatula</i>                             | Supplemental material from reference | Gao et al., 2016        | 10.1186/s13059-015-0867-y    |
|                | Fabaceae      | <i>Pisum sativum</i>                                   | DQ788719.1                           | Kalendar et al., 2008   | 10.1073/pnas.0709698105      |
| Rosales        | Cannabaceae   | <i>Cannabis sativa</i>                                 | Supplemental material from reference | Gao et al., 2016        | 10.1186/s13059-015-0867-y    |
|                | Rosaceae      | <i>Chaenomeles japonica</i>                            | AY860309.1                           | Kalendar et al., 2008   | 10.1073/pnas.0709698105      |
|                | Rosaceae      | <i>Fragaria x ananassa</i>                             | AY860312.1                           | Kalendar et al., 2008   | 10.1073/pnas.0709698105      |
|                | Rosaceae      | <i>Malus domestica</i>                                 | AY603366.1                           | Kalendar et al., 2008   | 10.1073/pnas.0709698105      |
|                | Rosaceae      | <i>Prunus domestica</i>                                | AY860314.1                           | Kalendar et al., 2008   | 10.1073/pnas.0709698105      |
|                | Rosaceae      | <i>Rosa hybrid</i>                                     | AY860315.1                           | Kalendar et al., 2008   | 10.1073/pnas.0709698105      |
|                | Rosaceae      | <i>Rosa rugosa</i>                                     | AY860316.1                           | Kalendar et al., 2008   | 10.1073/pnas.0709698105      |
|                | Rosaceae      | <i>Rubus idaeus</i>                                    | AY860317.1                           | Kalendar et al., 2008   | 10.1073/pnas.0709698105      |
| Brassicales    | Brassicaceae  | <i>Arabidopsis lyrata</i>                              | Supplemental material from reference | Gao et al., 2016        | 10.1186/s13059-015-0867-y    |
|                | Brassicaceae  | <i>Arabidopsis thaliana</i>                            | Supplemental material from reference | Gao et al., 2016        | 10.1186/s13059-015-0867-y    |
|                | Brassicaceae  | <i>Brassica oleracea</i>                               | AY860307.1                           | Kalendar et al., 2008   | 10.1073/pnas.0709698105      |
|                | Brassicaceae  | <i>Brassica rapa</i>                                   | AY860308.1                           | Kalendar et al., 2008   | 10.1073/pnas.0709698105      |
|                | Brassicaceae  | <i>Thellungiella parvula</i>                           | Supplemental material from reference | Gao et al., 2016        | 10.1186/s13059-015-0867-y    |
|                | Brassicaceae  | <i>Thellungiella salsuginea</i>                        | Supplemental material from reference | Gao et al., 2016        | 10.1186/s13059-015-0867-y    |
| Caryophyllales | Aioaceae      | <i>Mesembryanthemum crystallinum</i>                   | AY603370.1                           | Kalendar et al., 2008   | 10.1073/pnas.0709698105      |
|                | Amaranthaceae | <i>Amaranthus palmeri</i>                              | MT230479.1                           | Kalendar et al., 2020   | 10.3390/ijms21082931         |

|          |                 |                             |            |                       |                         |
|----------|-----------------|-----------------------------|------------|-----------------------|-------------------------|
|          | Amaranthaceae   | <i>Beta vulgaris</i>        | MK216566.1 | Maiwald et al., 2021  | 10.1093/aob/mcaa176     |
|          | Amaranthaceae   | <i>Chenopodium quinoa</i>   | –          | Maiwald et al., 2021  | 10.1093/aob/mcaa176     |
|          | Caryophyllaceae | <i>Colobanhus quitensis</i> | EU882730.1 | Kalendar et al., 2020 | 10.3390/ijms21082931    |
|          | Caryophyllaceae | <i>Silene latifolia</i>     | KC686837.1 | Kalendar et al., 2020 | 10.3390/ijms21082931    |
| Ericales | Ericaceae       | <i>Vaccinium corymbosum</i> | DQ673669.1 | Kalendar et al., 2008 | 10.1073/pnas.0709698105 |

**Suppl. table 1B: Data sources for published Asteraceae genomes**

| plant family                | lineage          | species                             | accession number                                                                              | platform                 | reference                          | DOI                        |
|-----------------------------|------------------|-------------------------------------|-----------------------------------------------------------------------------------------------|--------------------------|------------------------------------|----------------------------|
| Asteraceae                  | Asteroideae      | <i>Artemisia annua</i>              | PKPP00000000                                                                                  | ENA                      | Shen <i>et al.</i> , 2018          | 10.1016/j.molp.2018.03.015 |
|                             |                  | <i>Bidens hawaiiensis</i>           | GCA_021521975.1                                                                               | ENA                      | Bellinger <i>et al.</i> , 2022     | 10.1093/jhered/esab077     |
|                             |                  | <i>Chrysanthemum indicum</i>        | GWHBHNH00000000                                                                               | genome warehouse         | –                                  |                            |
|                             |                  | <i>Conyza (Erigeron) canadensis</i> | JSWR01000000                                                                                  | ENA                      | Peng <i>et al.</i> , 2014          | 10.1104/pp.114.247668      |
|                             |                  | <i>Glebionis cornaria</i>           | JANFOE000000000.1                                                                             | ENA                      | Wang <i>et al.</i> , 2022          | 10.1093/dnares/dsac036     |
|                             |                  | <i>Helianthus anuus</i>             | GCF_002127325.2                                                                               | ENA                      | Badouin <i>et al.</i> , 2017       | 10.1038/nature22380        |
|                             |                  | <i>Helichrysum umbraculigerum</i>   | CATIUR010000000                                                                               | ENA                      | Berman <i>et al.</i> , 2023        | 10.1038/s41477-023-01402-3 |
|                             |                  | <i>Mikania micrantha</i>            | GCA_009363875.1                                                                               | ENA                      | Liu <i>et al.</i> , 2020           | 10.1038/s41467-019-13926-4 |
|                             |                  | <i>Pluchea indica</i>               | GWHBCJV00000000                                                                               | genome warehouse         | He <i>et al.</i> , 2022            | 10.1038/s41559-022-01744-9 |
|                             |                  | <i>Scalesia atractyloides</i>       | <a href="https://doi.org/10.5061/dryad.8gtht76rh">https://doi.org/10.5061/dryad.8gtht76rh</a> | dryad                    | Cerca <i>et al.</i> , 2022         | 10.1038/s41467-022-31280-w |
|                             |                  | <i>Smallanthus sonchifolius</i>     | JAKNSE010000000                                                                               | ENA                      | Fan <i>et al.</i> , 2022           | 10.1111/1755-0998.13675    |
|                             |                  | <i>Stevia rebaudiana</i>            | GCA_009936405                                                                                 | ENA                      | Xu <i>et al.</i> , 2021            | 10.1038/s41438-021-00565-4 |
|                             |                  | <i>Tanacetum cinerariifolium</i>    | BKCI000000000.1                                                                               | ENA                      | Yamashiro <i>et al.</i> , 2019     | 10.1038/s41598-019-54815-6 |
|                             |                  | Cichorioideae                       |                                                                                               | <i>Cichorium endivia</i> | GCA_023376185.1                    | ENA                        |
| <i>Cichorium intybus</i>    | JAKNSD000000000  |                                     |                                                                                               | ENA                      | Fan <i>et al.</i> , 2022           | 10.1111/1755-0998.13675    |
| <i>Lactuca sativa</i>       | GCF_002870075.4  |                                     |                                                                                               | ENA                      | Reyes-Chin-Wo <i>et al.</i> , 2017 | 10.1038/ncomms14953        |
| <i>Taraxakum kok-saghyz</i> | GWHBCHF000000000 |                                     |                                                                                               | genome warehouse         | Lin <i>et al.</i> , 2021           | 10.1007/s11427-021-2033-2  |
| <i>Taraxacum mongolicum</i> | GWHBCHG000000000 |                                     |                                                                                               | genome warehouse         | Lin <i>et al.</i> , 2021           | 10.1007/s11427-021-2033-2  |
| Carduoideae                 |                  | <i>Arctium lappa</i>                | GCA_023525745.1                                                                               | ENA                      | Fan <i>et al.</i> , 2022           | 10.1111/1755-0998.13675    |
|                             |                  | <i>Carthamus tinctorius</i>         | GCA_001633085.1                                                                               | ENA                      | Wu <i>et al.</i> , 2021            | 10.1111/pbi.13586          |
|                             |                  | <i>Cynara cardunculus</i>           | GCA_001531365.2                                                                               | ENA                      | Scaglione <i>et al.</i> , 2016     | 10.1038/srep19427          |

**Suppl. table 1C: Data sources for published 5S rRNA genes**

| species                        | accession number | repository | reference                   | DOI                               |
|--------------------------------|------------------|------------|-----------------------------|-----------------------------------|
| <i>Ambylopyrum muticum</i>     | EU924818         | NCBI       | Baum et al., 2009           | 10.1139/g03-146                   |
| <i>Arabidopsis lyrata</i>      | E02158           | 5S rRNAdb  | Szymanski et al., 2016      | 10.1093/nar/gkv1081               |
| <i>Arabidopsis thaliana</i>    | E00006           | 5S rRNAdb  | Szymanski et al., 2016      | 10.1093/nar/gkv1081               |
| <i>Avena sativa</i>            | EF071696         | NCBI       | Peng et al., 2008           | 10.1104/pp.114.247668             |
| <i>Beta vulgaris</i>           | Z25804           | NCBI       | Schmidt et al., 1994        | 10.1007/BF01253964                |
| <i>Brachypodium distachyon</i> | XR_002960580     | NCBI       | Thibaud-Nissen et al., 2016 | 10.2527/jas2016.94supplement4184x |
| <i>Brassica rapa</i>           | E02489           | 5S rRNAdb  | Szymanski et al., 2016      | 10.1093/nar/gkv1081               |
| <i>Cannabis sativa</i>         | XR_004008092     | NCBI       | Thibaud-Nissen et al., 2016 | 10.2527/jas2016.94supplement4184x |
| <i>Cajanus cajan</i>           | XR_003803880     | NCBI       | Thibaud-Nissen et al., 2016 | 10.2527/jas2016.94supplement4184x |
| <i>Chrysanthemum indicum</i>   | OK181863         | NCBI       | -                           |                                   |
| <i>Cynara cardunculus</i>      | XR_003070488     | NCBI       | Thibaud-Nissen et al., 2016 | 10.2527/jas2016.94supplement4184x |
| <i>Eremopyrum distans</i>      | KC188473         | NCBI       | Baum et al., 2013           | 10.1139/gen-2012-0195             |
| <i>Fragaria x ananassa</i>     | E00852           | 5S rRNAdb  | Szymanski et al., 2016      | 10.1093/nar/gkv1081               |
| <i>Glycine max</i>             | XR_005890139     | NCBI       | Thibaud-Nissen et al., 2016 | 10.2527/jas2016.94supplement4184x |
| <i>Henrardia persica</i>       | KC188485         | NCBI       | Baum et al., 2013           | 10.1139/gen-2012-0195             |
| <i>Hordeum brachyantherum</i>  | AY034775         | NCBI       | Baum & Johnson, 2011        | 10.1139/b02-057                   |
| <i>Hordeum marinum</i>         | AF027583         | NCBI       | Baum & Johnson, 1998        | PMID: 9809436                     |
| <i>Hordeum vulgare</i>         | HVU07378         | NCBI       | Baum & Johnson, 1994        | 10.1139/g94-140                   |
| <i>Jatropha curcas</i>         | E00420           | 5S rRNAdb  | Szymanski et al., 2016      | 10.1093/nar/gkv1081               |
| <i>Lactuca sativa</i>          | E00211           | 5S rRNAdb  | Szymanski et al., 2016      | 10.1093/nar/gkv1081               |
| <i>Linum usitatissimum</i>     | X01531           | NCBI       | Goldsbrough et al., 1982    | 10.3390/ijms22031302              |
| <i>Lotus japonicus</i>         | AY040715         | NCBI       | Pedrosa et al., 2002        | 10.1093/genetics/161.4.1661       |
| <i>Malus domestica</i>         | XR_003771672     | NCBI       | Thibaud-Nissen et al., 2016 | 10.2527/jas2016.94supplement4184x |
| <i>Medicago truncatula</i>     | XR_005644521     | NCBI       | Thibaud-Nissen et al., 2016 | 10.2527/jas2016.94supplement4184x |
| <i>Oryza brachyantha</i>       | XR_005812828     | NCBI       | Thibaud-Nissen et al., 2016 | 10.2527/jas2016.94supplement4184x |
| <i>Oryza sativa</i>            | E00234           | 5S rRNAdb  | Szymanski et al., 2016      | 10.1093/nar/gkv1081               |
| <i>Panicum virgatum</i>        | XR_005680461     | NCBI       | Thibaud-Nissen et al., 2016 | 10.2527/jas2016.94supplement4184x |
| <i>Pisum sativum</i>           | AY499178         | NCBI       | Ellis et al., 1988          | 10.1007/BF00337732                |
| <i>Pyrus breitschneiderii</i>  | E02495           | 5S rRNAdb  | Szymanski et al., 2016      | 10.1093/nar/gkv1081               |
| <i>Secale cereale</i>          | AJ307365         | NCBI       | Fulnecek et al., 2002       | 10.1007/s00438-002-0761-7         |
| <i>Setaria italica</i>         | KC525411         | NCBI       | Zhao et al., 2013           | 10.1186/1471-2164-14-244          |
| <i>Silene latifolia</i>        | AB027248         | NCBI       | -                           |                                   |
| <i>Triticum aestivum</i>       | E00299           | 5S rRNAdb  | Szymanski et al., 2016      | 10.1093/nar/gkv1081               |
| <i>Zea mays</i>                | E00011           | 5S rRNAdb  | Szymanski et al., 2016      | 10.1093/nar/gkv1081               |

**Suppl. table 1D: Data sources for used plant read data**

**data for Asteraceae species**

| species                           | read accession               | platform              | library layout | library strategy | library source | read length |
|-----------------------------------|------------------------------|-----------------------|----------------|------------------|----------------|-------------|
| <i>Arctium lappa</i>              | ERR5554584                   | illumina HiSeq 2500   | paired         | WGS              | genomic        | 101         |
| <i>Artemisia annua</i>            | ERR11535563                  | illumina NovaSeq 6000 | paired         | WGS              | genomic        | 150         |
| <i>Bidens hawaiiensis</i>         | SRR14191093                  | pacBIO SMRT           | single         | WGS              | genomic        | -           |
| <i>Carthamus tinctorius</i>       | SRR2154065                   | illumina HiSeq 1500   | paired         | WGS              | genomic        | 101         |
| <i>Chrysanthemum indicum</i>      | CRR389876 (genome warehouse) | illumina NovaSeq 6000 | paired         | WGS              | genomic        | 150         |
| <i>Conyza canadensis</i>          | NA                           | NA                    | NA             | NA               | NA             | NA          |
| <i>Glebionis coronaria</i>        | SRR20302831                  | illumina NovaSeq 6000 | paired         | WGS              | genomic        | 150         |
| <i>Helianthus annuus</i>          | SRR2919251                   | illumina HiSeq 2000   | paired         | WGS              | genomic        | 100         |
| <i>Helichrysum umbraculigerum</i> | ERR10735438                  | pacBIO SMRT           | single         | WGS              | genomic        | -           |
| <i>Mikania micrantha</i>          | SRR8835137                   | illumina HiSeq X Ten  | paired         | WGS              | genomic        | 150         |
| <i>Pluchea indica</i>             | SRR18449574                  | illumina NovaSeq 6000 | paired         | RNA-Seq          | transcriptomic | 150         |
| <i>Scalesia atractyloides</i>     | ERR9715097                   | pacBIO SMRT           | single         | WGS              | genomic        | -           |
| <i>Smallanthus sonchifolius</i>   | SRR18215734                  | illumina NovaSeq 6000 | paired         | WGS              | genomic        | 150         |
| <i>Stevia rebaudiana</i>          | SRR6792730                   | illumina HiSeq X Ten  | paired         | WGS              | genomic        | 151         |
| <i>Tagetes patula</i>             | SRR19579335                  | illumina HiSeq X Ten  | paired         | WGS              | genomic        | 150         |
| <i>Tanacetum cinerariifolium</i>  | SRR17714824                  | illumina NovaSeq 6000 | paired         | WGS              | genomic        | 151         |

**data for outgroups**

| species                    | read accession | platform                  | library layout | library strategy | library source | read length |
|----------------------------|----------------|---------------------------|----------------|------------------|----------------|-------------|
| <i>Beta vulgaris</i>       | SRR868931      | Roche 454 GS FLX Titanium | paired         | WGA              | genomic        | 100         |
| <i>Fragaria x ananassa</i> | SRR8358385     | illumina HiSeq 4000       | paired         | WXS              | genomic        | 150         |
| <i>Lotus japonicus</i>     | DRR014730      | illumina HiSeq 2000       | paired         | WGS              | genomic        | 100         |
| <i>Hordeum vulgare</i>     | SRR1804518     | illumina HiSeq 2000       | paired         | WGS              | genomic        | 90          |

**Suppl. table 1E: Data sources and metadata for linkage vizualisation**

**data for Asteraceae species**

| species                           | genome_size* [Gbp] | genome_size_ref         | DOI                              | read_accession  | cov_used | seq_technique |
|-----------------------------------|--------------------|-------------------------|----------------------------------|-----------------|----------|---------------|
| <i>Arctium lappa</i>              | 1.79               | Song et al., 2023       | 0.1186/s12870-023-04092-3        | ERR5554584      | 0.5x     | illumina      |
| <i>Artemisia annua</i>            | 1.74               | Shen et al., 2018       | 10.1016/j.jp1ph.2018.11.007      | (Upload needed) | 1x       | illumina      |
| <i>Bidens hawaiiensis</i>         | 7.56               | Bellinger et al, 2022   | 10.1093/jhered/esab077           | SRR14191093     | 1x       | PacBio HiFi   |
| <i>Carthamus tinctorius</i>       | 1.32               | Nasab et al., 2023      | 10.1038/s41598-023-33347-0       | SRR2154065      | 1x       | illumina      |
| <i>Chrysanthemum indicum</i>      | 3.02               | Li et al., 2012         | 10.1111/j.1759-6831.2012.00241.x | CRR389876       | 1x       | ONT           |
| <i>Glebionis coronaria</i>        | 6.80               | Wang et al., 2022       | 10.1093/dnares/dsac036           | SRR20302831     | 1x       | illumina      |
| <i>Helianthus annuus</i>          | 3.60               | Staton et al., 2012     | 10.1111/j.1365-313X.2012.05072.x | SRR2919251      | 0.3x     | illumina      |
| <i>Helichrysum umbraculigerum</i> | 1.30               | CATIUR000000000.1       | NA                               | ERR10735438     | 1x       | illumina      |
| <i>Mikania micrantha</i>          | 1.87               | Liu et al., 2020        | 10.1186/s12864-019-6361-7        | SRR8835137      | 1x       | illumina      |
| <i>Scalesia atractyloides</i>     | 3.2                | Cerca, 2022             | 10.5061/dryad.8gtht76rh          | ERR9715097      | 1x       | PacBio HiFi   |
| <i>Smallanthus sonchifolius</i>   | 2.72               | Fan et al., 2022        | 10.1111/1755-0998.13675          | SRR18215734     | 1x       | illumina      |
| <i>Stevia rebaudiana</i>          | 0.40               | O'Neill and Pirro, 2020 | 10.12688/f1000research.24396.1   | SRR6792730      | 1x       | illumina      |
| <i>Tagetes patula</i>             | 0.43               | JAOYNQ000000000.1       | NA                               | SRR19579335     | 1x       | illumina      |
| <i>Tanacetum cinerariifolium</i>  | 7.10               | Yamashiro et al 2019    | 10.1038/s41598-019-54815-6       | SRR17714824     | 1x       | illumina      |

**data for outgroups**

|                            |      |                     |                             |             |    |          |
|----------------------------|------|---------------------|-----------------------------|-------------|----|----------|
| <i>Beta vulgaris</i>       | 0.75 | Dohm et al., 2014   | 10.1038/nature12817         | SRR952964   | 1x | illumina |
| <i>Fragaria x ananassa</i> | 0.70 | Isobe et al., 2018  | 0.1007/978-3-319-76020-9_10 | SRR16002690 | 1x | illumina |
| <i>Lotus japonicus</i>     | 0.50 | Mun et al., 2016    | 10.1038/srep39447           | DRR014730   | 1x | illumina |
| <i>Hordeum vulgare</i>     | 5.10 | Hisano et al., 2016 | 10.1186/s12864-016-3159-3   | SRR21763618 | 1x | illumina |

**\* *measured or assembled genome size as used for coverage calculation***
